# Supplementary material for: The Association of Death Receptors and TGF-β1 Expression in Urothelial Bladder Cancer and Their Prognostic Significance
Source: MDPI journal article supplement (doi:10.3390/biomedicines12051123), 2024-05-18
Supplement: s1 [file s1]

## Supplement S1

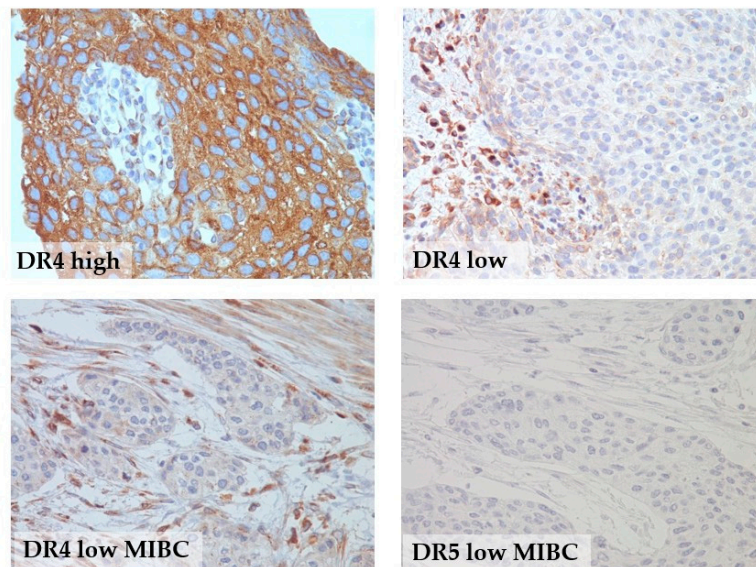

**Figure S1.** The examples of immunohistochemical staining of death receptors in urothelial bladder cancer. In the upper row are representative photomicrographs of high and low DR4 expression in non-muscle-invasive bladder cancer (NMIBC). The lower row contains photomicrographs of the same case of muscle-invasive bladder cancer (MIBC) with low DR4 and low DR5 expression.

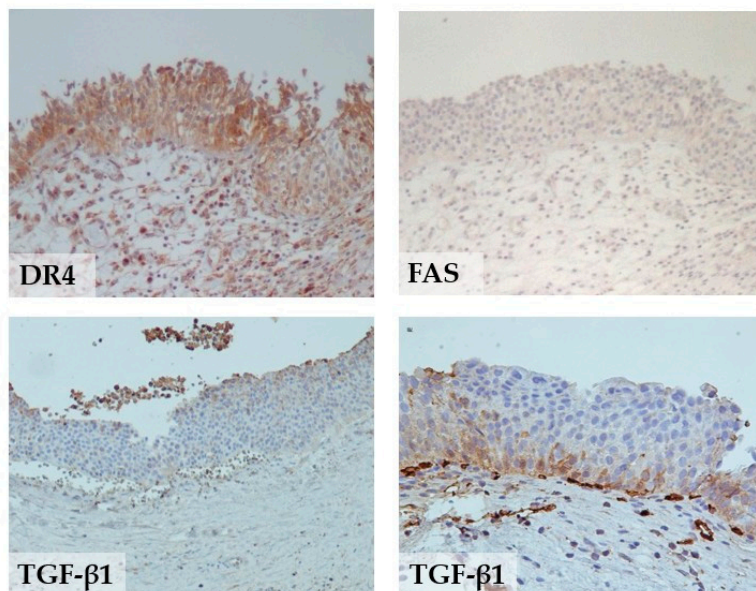

**Figure S2.** Immunohistochemical staining of death receptors and TGF- $\beta$ 1 in non-neoplastic bladder mucosa. In non-neoplastic urothelium, death receptors DR4 and DR5 showed diffuse granular cytoplasmic and membranous expression, while FAS displayed fine, delicate membranous staining with accentuation in umbrella cells. TGF- $\beta$ 1 stained membranes of basal and/or apical layers, but never full thickness of the urothelium. In addition, DR4 stained stromal immune cells, while TGF- $\beta$ 1 showed reactivity in stromal mesenchymal and some inflammatory cells.
